# Supplementary material for: Overcoming Challenges and Opening New Opportunities in Glycoproteomics
Source: Biomolecules. 2013 Mar 22;3(2):270–86. doi: 10.3390/biom3020270 (PMC4002168; doi:10.3390/biom3020270)
Supplement: Supplementary File 1 — Supplementary Information (XLSX, 27 KB) [file biomolecules-03-00270-s001.xlsx]

## Sheet: GlycoID
Accession Number	Protein Name	N-linked Sites Identified in This Study
P08195	4F2 cell-surface antigen heavy chain	365, 424
P21589	5'-nucleotidase	53, 311, 333, 403
Q13510	Acid ceramidase	259, 286, 348
Q92484	Acid sphingomyelinase-like phosphodiesterase 3a	222, 238, 263
Q6UY14	ADAMTS-like protein 4	1001
Q9HDC9	Adipocyte plasma membrane-associated protein	160
O00468	Agrin	135, 250, 932
P05186	Alkaline phosphatase, tissue-nonspecific isozyme	140, 271, 303, 430
Q6UW56	All-trans retinoic acid-induced differentiation factor	157, 168
P01011	Alpha-1-antichymotrypsin	93, 106, 127, 271
A8K2U0	Alpha-2-macroglobulin-like protein 1	1020
P35475	Alpha-L-iduronidase	110
P17050	Alpha-N-acetylgalactosaminidase	177, 201
P15144	Aminopeptidase N	128, 234, 265, 681, 735, 818
P15848	Arylsulfatase B	188, 366
O75882	Attractin	264, 300, 325, 416, 428, 914, 923, 1043
P50895	Basal cell adhesion molecule	377, 383, 439
P35613	Basigin	160, 268, 302
P16278	Beta-galactosidase	464
P06865	Beta-hexosaminidase subunit alpha	157
P07686	Beta-hexosaminidase subunit beta	84, 190, 323, 327
O00462	Beta-mannosidase	77, 280,
P21810	Biglycan	270, 311
P43251	Biotinidase	119, 150, 349
Q10589	Bone marrow stromal antigen 2	65, 92
P55290	Cadherin-13	86,500, 530, 638, 671
Q9UQC9	Calcium-activated chloride channel regulator 2	150, 822
O75976	Carboxypeptidase D	172, 399, 410, 522, 811, 867, 1070
P16870	Carboxypeptidase E	390
P14384	Carboxypeptidase M	38, 164
Q9Y646	Carboxypeptidase Q	179
P13688	Carcinoembryonic antigen-related cell adhesion molecule 1	345, 351, 363, 378
P40199	Carcinoembryonic antigen-related cell adhesion molecule 6	224
P07858	Cathepsin B	192
P07339	Cathepsin D	134, 263
Q9UBX1	Cathepsin F	367, 378
P07711	Cathepsin L1	221
O60911	Cathepsin L2	221
P20645	Cation-dependent mannose-6-phosphate receptor	83, 107, 113
P11717	Cation-independent mannose-6-phosphate receptor	112, 435, 543, 581, 626, 747, 871, 951, 957, 1246, 1312, 1656, 1757, 1816, 2085, 2136
Q6YHK3	CD109 antigen	68, 118, 247, 365, 397, 419, 513,1086
P48509	CD151 antigen	159
Q13740	CD166 antigen	91, 95, 167, 265, 306, 361, 457, 466, 480, 499
Q5ZPR3	CD276 antigen	91, 104, 189, 215, 322, 407
P16070	CD44 antigen	57, 599
P13987	CD59 glycoprotein	43
P08962	CD63 antigen	130, 150, 172
P32970	CD70 antigen	63, 170
P27701	CD82 antigen	129, 157, 198
P48960	CD97 antigen	33, 38, 108,371, 453
Q8NFZ8	Cell adhesion molecule 4	67, 262, 286
Q9NV96	Cell cycle control protein 50A	107, 294
Q3MIR4	Cell cycle control protein 50B	286
O75503	Ceroid-lipofuscinosis neuronal protein 5	203, 271, 281
P00450	Ceruloplasmin	138, 397
Q8IWA5	Choline transporter-like protein 2	187, 200, 417
Q9NY35	Claudin domain-containing protein 1	42, 72
P10909	Clusterin	291, 374
Q96EE4	Coiled-coil domain-containing protein 126	134
Q02388	Collagen alpha-1(VII) chain	337, 786
Q9NZP8	Complement C1r subcomponent-like protein	296
P01024	Complement C3	85
P0C0L5	Complement C4-B	226, 1328, 1391
P08174	Complement decay-accelerating factor	95
P08603	Complement factor H	882, 911, 1029, 1095
P05156	Complement factor I	70, 103, 177, 464, 494, 536
P78310	Coxsackievirus and adenovirus receptor	106, 201
Q9UBG0	C-type mannose receptor 2	69, 140, 364, 497, 588, 634
Q9H5V8	CUB domain-containing protein 1	39, 122, 180, 270, 386, 577
Q96HD1	Cysteine-rich with EGF-like domain protein 1	205
Q6UXH1	Cysteine-rich with EGF-like domain protein 2	190, 251
O00115	Deoxyribonuclease-2-alpha	86, 266
Q02487	Desmocollin-2	546
Q14126	Desmoglein-2	112, 182, 462
P32926	Desmoglein-3	545
Q01459	Di-N-acetylchitobiase	262, 299
P53634	Dipeptidyl peptidase 1	53, 119, 276
Q9UHL4	Dipeptidyl peptidase 2	315, 428
O14672	Disintegrin and metalloproteinase domain-containing protein 10	267, 278, 551
P78536	Disintegrin and metalloproteinase domain-containing protein 17	452, 539, 594
P46977	Dolichyl-diphosphooligosaccharide--protein glycosyltransferase subunit STT3A	548
Q8TCJ2	Dolichyl-diphosphooligosaccharide--protein glycosyltransferase subunit STT3B	623, 627
Q8IZA0	Dyslexia-associated protein KIAA0319-like protein	395, 890
Q14118	Dystroglycan	649
Q9Y5L3	Ectonucleoside triphosphate diphosphohydrolase 2	129, 378
Q9Y6X5	Ectonucleotide pyrophosphatase/phosphodiesterase family member 4	155, 166, 276
Q9UJA9	Ectonucleotide pyrophosphatase/phosphodiesterase family member 5	158, 292, 329
Q6P179	Endoplasmic reticulum aminopeptidase 2	85, 294
Q7Z2K6	Endoplasmic reticulum metallopeptidase 1	819
P14625	Endoplasmin	62, 217
P42892	Endothelin-converting enzyme 1	166, 210, 270, 316, 383
P52803	Ephrin-A5	37
P98172	Ephrin-B1	139
P52799	Ephrin-B2	139
P00533	Epidermal growth factor receptor	175, 352, 413, 568, 603
P61916	Epididymal secretory protein E1	58
Q9Y2E5	Epididymis-specific alpha-mannosidase	516, 670, 675, 748
P16422	Epithelial cell adhesion molecule	111, 198
Q96HE7	ERO1-like protein alpha	280
P02751	Fibronectin	528, 542
P23142	Fibulin-1	535, 539
P15328	Folate receptor alpha	69, 161
O95633	Follistatin-related protein 3	73, 215
Q08380	Galectin-3-binding protein	69, 125, 192, 398, 551, 580
P19440	Gamma-glutamyltranspeptidase 1	120, 230, 511
P13284	Gamma-interferon-inducible lysosomal thiol reductase	63, 95, 108
P17900	Ganglioside GM2 activator	63
P07093	Glia-derived nexin	118
P14314	Glucosidase 2 subunit beta	72
P04062	Glucosylceramidase	98, 185, 309
P35052	Glypican-1	79, 116
Q92896	Golgi apparatus protein 1	165, 210, 581, 677
Q8NBJ4	Golgi membrane protein 1	109, 144
Q96S52	GPI transamidase component PIG-S	370
P28799	Granulins	236, 265, 530
Q8NCC3	Group XV phospholipase A2	273, 289
Q9Y251	Heparanase	217, 238
P30825	High affinity cationic amino acid transporter 1	226
P30498	HLA class I histocompatibility antigen, B-78 alpha chain	110
P04233	HLA class II histocompatibility antigen gamma chain	130, 136, 256
P01903	HLA class II histocompatibility antigen, DR alpha chain	103, 143
P04229	HLA class II histocompatibility antigen, DRB1-1 beta chain	48
Q9Y4L1	Hypoxia up-regulated protein 1	515, 830, 862, 869, 931
P22304	Iduronate 2-sulfatase	115, 246, 280
O14498	Immunoglobulin superfamily containing leucine-rich repeat protein	309
O75054	Immunoglobulin superfamily member 3	101, 961, 1077
Q969P0	Immunoglobulin superfamily member 8	327, 463
Q13308	Inactive tyrosine-protein kinase 7	175, 283, 405, 463, 567, 646
Q70UQ0	Inhibitor of nuclear factor kappa-B kinase-interacting protein	144
P17936	Insulin-like growth factor-binding protein 3	116, 136, 199
P17301	Integrin alpha-2	105, 112, 343, 432, 460, 475, 1057
P26006	Integrin alpha-3	86, 265, 511, 573, 656, 926, 935
P08648	Integrin alpha-5	84, 182, 307, 675, 771, 773, 868
P23229	Integrin alpha-6	323, 770, 966, 997
P06756	Integrin alpha-V	74, 874
P05556	Integrin beta-1	50, 212, 269, 363, 403, 406, 411, 417, 481, 520, 669
P18084	Integrin beta-5	347, 477, 552, 586, 654, 705
P18564	Integrin beta-6	48, 97, 260, 463, 471, 541, 575
P05362	Intercellular adhesion molecule 1	130, 145, 183, 202, 260, 267, 385, 406
P40189	Interleukin-6 receptor subunit beta	379, 383, 390
Q9Y624	Junctional adhesion molecule A	185
Q9Y337	Kallikrein-5	173, 208
Q96J84	Kin of IRRE-like protein 1	140
O43278	Kunitz-type protease inhibitor 1	235
O43291	Kunitz-type protease inhibitor 2	94
Q08431	Lactadherin	228, 238, 325, 329
Q16787	Laminin subunit alpha-3	2162, 2265, 2365, 2502, 2584, 2751, 3097
P07942	Laminin subunit beta-1	1336, 1343
Q13751	Laminin subunit beta-3	604
Q13753	Laminin subunit gamma-2	942
Q14766	Latent-transforming growth factor beta-binding protein 1	347, 1366
Q99538	Legumain	167, 263, 272
Q08722	Leukocyte surface antigen CD47	73, 111
O14494	Lipid phosphate phosphohydrolase 1	142
O43688	Lipid phosphate phosphohydrolase 2	139
P01130	Low-density lipoprotein receptor	657
O95274	Ly6/PLAUR domain-containing protein 3	129, 176, 183
O60449	Lymphocyte antigen 75	135, 345, 1076, 1225, 1593
P19256	Lymphocyte function-associated antigen 3	169, 195
P11117	Lysosomal acid phosphatase	92, 133, 177, 267
P10253	Lysosomal alpha-glucosidase	140, 390, 470, 882, 925
O00754	Lysosomal alpha-mannosidase	133, 692, 766
P10619	Lysosomal protective protein	145, 333
Q8WWB7	Lysosomal protein NCU-G1	187
Q9UMR5	Lysosomal thioesterase PPT2	60
Q14108	Lysosome membrane protein 2	45,105, 206, 224, 249, 304, 325, 412
P11279	Lysosome-associated membrane glycoprotein 1	37, 45, 62, 76, 84, 103, 121, 130, 165, 181, 223, 228, 241, 249, 261, 293, 322
P13473	Lysosome-associated membrane glycoprotein 2	49, 75, 101, 229, 242, 257, 275, 300, 307, 317, 356
Q9UQV4	Lysosome-associated membrane glycoprotein 3	232, 266
Q04912	Macrophage-stimulating protein receptor	419, 458, 488, 720, 841
P34810	Macrosialin	164, 199, 279
P04156	Major prion protein	181, 197
Q9H8J5	MANSC domain-containing protein 1	72,
P15529	Membrane cofactor protein	83, 273
Q8TBP5	Membrane protein FAM174A	83
Q3ZCQ3	Membrane protein FAM174B	53, 71
Q13421	Mesothelin	388, 496, 523
Q6P4Q7	Metal transporter CNNM4	122
Q29983	MHC class I polypeptide-related sequence A	79, 125, 220, 289
P08571	Monocyte differentiation antigen CD14	151, 282
Q8WXI7	Mucin-16	12274, 12395, 21745
O95297	Myelin protein zero-like protein 1	50, 130
O60487	Myelin protein zero-like protein 2	39, 118
P34059	N-acetylgalactosamine-6-sulfatase	204, 423
Q9UK23	N-acetylglucosamine-1-phosphodiester alpha-N-acetylglucosaminidase	366
Q3T906	N-acetylglucosamine-1-phosphotransferase subunits alpha/beta	148, 699, 759
P15586	N-acetylglucosamine-6-sulfatase	111, 117, 183, 279, 362, 405, 422, 449
Q02083	N-acylethanolamine-hydrolyzing acid amidase	37
P08473	Neprilysin	145, 285
P32004	Neural cell adhesion molecule L1	671, 979
P46531	Neurogenic locus notch homolog protein 1	41, 1489
Q04721	Neurogenic locus notch homolog protein 2	46, 155
Q92823	Neuronal cell adhesion molecule	223, 858
Q13491	Neuronal membrane glycoprotein M6-b	177
O14786	Neuropilin-1	150, 261
Q9Y639	Neuroplastin	171, 197, 229, 284, 296, 317
Q15758	Neutral amino acid transporter B(0)	212
P80188	Neutrophil gelatinase-associated lipocalin	85
Q5JS37	NHL repeat-containing protein 3	206
Q92542	Nicastrin	45, 55, 435, 506, 530, 612
O15118	Niemann-Pick C1 protein	122, 135, 185, 916, 961
P69849	Nodal modulator 3	369
P51688	N-sulphoglucosamine sulphohydrolase	41, 264, 413
Q8TEM1	Nuclear pore membrane glycoprotein 210	405, 681
Q99650	Oncostatin-M-specific receptor subunit beta	176, 326
Q86WC4	Osteopetrosis-associated transmembrane protein 1	93135263
P50897	Palmitoyl-protein thioesterase 1	197, 212, 232
P23284	Peptidyl-prolyl cis-trans isomerase B	148
Q96AY3	Peptidyl-prolyl cis-trans isomerase FKBP10	70, 182, 294, 310, 393
Q6P4A8	Phospholipase B-like 1	71, 411
Q8IV08	Phospholipase D3	236, 387
P53801	Pituitary tumor-transforming gene 1 protein-interacting protein	45, 54
Q6UX71	Plexin domain-containing protein 2	103, 316
O15031	Plexin-B2	127, 391, 402, 733, 795, 1049, 1099
O00592	Podocalyxin	144, 360
P15151	Poliovirus receptor	120
Q15223	Poliovirus receptor-related protein 1	72, 139, 202, 286, 307
Q92692	Poliovirus receptor-related protein 2	324
Q96NY8	Poliovirus receptor-related protein 4	281
Q9UHG3	Prenylcysteine oxidase 1	353
P07602	Proactivator polypeptide	80, 101, 215, 332, 426
P09668	Pro-cathepsin H	101, 230
Q8NBJ5	Procollagen galactosyltransferase 1	96, 381
Q07954	Prolow-density lipoprotein receptor-related protein 1	446, 729, 1511, 1575, 1645, 2127, 2472, 3333, 3488, 3788, 3839
O43490	Prominin-1	220, 274, 395, 414, 729
Q8N271	Prominin-2	540, 707
Q9P2B2	Prostaglandin F2 receptor negative regulator	300, 383, 413, 600, 618, 691
O43653	Prostate stem cell antigen	40
P15309	Prostatic acid phosphatase	94, 220
Q9BT09	Protein canopy homolog 3	153
O75629	Protein CREG1	160, 193, 216
Q5VW38	Protein GPR107	169
Q9C0H2	Protein tweety homolog 3	144, 351
O96014	Protein Wnt-11	40, 90
Q8NHP8	Putative phospholipase B-like 2	88, 465, 515
P04626	Receptor tyrosine-protein kinase erbB-2	124, 530
P10586	Receptor-type tyrosine-protein phosphatase F	250, 295, 721, 959, 966
P23470	Receptor-type tyrosine-protein phosphatase gamma	109, 156, 444
Q15262	Receptor-type tyrosine-protein phosphatase kappa	140, 211, 416
P49788	Retinoic acid receptor responder protein 1	142
O00584	Ribonuclease T2	106, 212
Q8WTV0	Scavenger receptor class B member 1	310, 330
Q6UXD5	Seizure 6-like protein 2	247, 373
Q12884	Seprase	99314
P02787	Serotransferrin	432, 630
P50454	Serpin H1	120
Q9HAT2	Sialate O-acetylesterase	138, 267, 401, 422
Q04900	Sialomucin core protein 24	72, 146
Q8TCT8	Signal peptide peptidase-like 2A	149, 155
P05026	Sodium/potassium-transporting ATPase subunit beta-1	158, 193, 265
P54709	Sodium/potassium-transporting ATPase subunit beta-3	124, 240
P11166	Solute carrier family 2, facilitated glucose transporter member 1	45
Q99523	Sortilin	98, 162, 406
O76061	Stanniocalcin-2	73
P08842	Steryl-sulfatase	259, 333
Q9UH99	SUN domain-containing protein 2	636
Q9Y5Y6	Suppressor of tumorigenicity 14 protein	109, 772
Q9UGT4	Sushi domain-containing protein 2	494
Q16563	Synaptophysin-like protein 1	71
P18827	Syndecan-1	231
Q8TB96	T-cell immunomodulatory protein	95
O60635	Tetraspanin-1	141, 154, 178, 184
O95857	Tetraspanin-13	137
O95858	Tetraspanin-15	189
O60637	Tetraspanin-3	127, 167, 183
O43657	Tetraspanin-6	134
P07204	Thrombomodulin	115, 382
P07996	Thrombospondin-1	360, 1067
P13726	Tissue factor	169
P48307	Tissue factor pathway inhibitor 2	116, 170
Q9BX74	TM2 domain-containing protein 1	197
O15455	Toll-like receptor 3	52, 70, 247
P02786	Transferrin receptor protein 1	251
O43493	Trans-Golgi network integral membrane protein 2	152
P43307	Translocon-associated protein subunit alpha	136, 191
Q9HD45	Transmembrane 9 superfamily member 3	174
Q7Z7H5	Transmembrane emp24 domain-containing protein 4	117
Q9BVK6	Transmembrane emp24 domain-containing protein 9	125
Q14956	Transmembrane glycoprotein NMB	200, 249, 275
O15393	Transmembrane protease serine 2	213, 249
Q9NUM4	Transmembrane protein 106B	183
Q24JP5	Transmembrane protein 132A	71
Q9P0T7	Transmembrane protein 9	38
O14773	Tripeptidyl-peptidase 1	210, 443
Q13641	Trophoblast glycoprotein	81, 124, 256, 275
P25942	Tumor necrosis factor receptor superfamily member 5	153, 180
P09758	Tumor-associated calcium signal transducer 2	120, 168
P78324	Tyrosine-protein phosphatase non-receptor type substrate 1	245, 270, 292
Q8N766	Uncharacterized protein KIAA0090	913
Q03405	Urokinase plasminogen activator surface receptor	222, 255
P00749	Urokinase-type plasminogen activator	322
Q12907	Vesicular integral-membrane protein VIP36	183
Q15904	V-type proton ATPase subunit S1	170, 261, 273
Q14508	WAP four-disulfide core domain protein 2	44
Q13433	Zinc transporter ZIP6	266
P25311	Zinc-alpha-2-glycoprotein	109, 128
